# Supplementary material for: Effects of Whey Protein or Its Hydrolysate Supplements Combined with an Energy-Restricted Diet on Weight Loss: A Randomized Controlled Trial in Older Women
Source: MDPI journal article supplement (doi:10.3390/nu14214540), 2022-10-28
Supplement: s1 [file s1]

Supplementary Table S2. Pathways significantly enriched for metabolites associated with change between treatment groups

| Metabolites                         |                                     | VIP  | trend | t.stat | p.value | FDR    | Pathway Name                                                                                                              |
|-------------------------------------|-------------------------------------|------|-------|--------|---------|--------|---------------------------------------------------------------------------------------------------------------------------|
| Comparison among the group changes  |                                     |      |       |        |         |        |                                                                                                                           |
| WP-control                          | Mevalonic acid                      | 2.04 | ↑**   | 3.31   | 0.002   | 0.046  | Terpenoid backbone biosynthesis                                                                                           |
| WPH-control                         | Citric acid                         | 1.89 | ↑**   | 4.20   | <0.001  | 0.005  | Citrate cycle (TCA cycle); Glyoxylate and dicarboxylate metabolism                                                        |
|                                     | Pyruvic acid                        | 1.68 | ↑**   | 3.42   | 0.002   | 0.020  | Pyruvate metabolism; Tyrosine metabolism; TCA cycle; Glyoxylate and dicarboxylate metabolism; Glycolysis/ Gluconeogenesis |
|                                     | Glyceric acid                       | 1.64 | ↑**   | 3.41   | 0.002   | 0.020  | Glyoxylate and dicarboxylate metabolism; Glycerolipid metabolism                                                          |
| WPH-WP                              | Citric acid                         | 1.86 | ↑**   | 3.22   | 0.004   | 0.047  | TCA cycle                                                                                                                 |
| Comparison between end and baseline |                                     |      |       |        |         |        |                                                                                                                           |
| Control                             | Tyrosine                            | 2.36 | ↑**   | 5.44   | <0.001  | <0.001 | Phenylalanine, tyrosine and tryptophan biosynthesis; Tyrosine metabolism                                                  |
|                                     | PC(18:4(6Z,9Z,12Z,15Z)/P-18:1(11Z)) | 1.90 | ↑**   | 4.11   | <0.001  | 0.004  | Arachidonic acid metabolism; Glycerophospholipid metabolism                                                               |
|                                     | Leukotriene C4                      | 1.77 | ↓**   | -3.45  | 0.002   | 0.014  | Arachidonic acid metabolism                                                                                               |

|     |                         |      |     |       |       |       |                                             |
|-----|-------------------------|------|-----|-------|-------|-------|---------------------------------------------|
|     | Methionine              | 1.70 | ↑** | 3.15  | 0.003 | 0.029 | Cysteine and methionine metabolism          |
| WP  | gamma-Aminobutyric acid | 2.05 | ↑** | 3.54  | 0.001 | 0.032 | Alanine, aspartate and glutamate metabolism |
|     | Tryptophan              | 1.97 | ↑** | 3.39  | 0.002 | 0.037 | Tryptophan metabolism                       |
| WPH | gamma-Aminobutyric acid | 2.02 | ↑** | 4.03  | 0.001 | 0.013 | Alanine, aspartate and glutamate metabolism |
|     | 2-Oxobutyric acid       | 1.93 | ↑** | 3.45  | 0.003 | 0.037 | Cysteine and methionine metabolism          |
|     | Histidine               | 1.89 | ↓** | -3.45 | 0.003 | 0.037 | Histidine metabolism                        |

---

\*\* $P < 0.01$ . FDR, false discovery rate.
