# Supplementary material for: Effects of Whey Protein or Its Hydrolysate Supplements Combined with an Energy-Restricted Diet on Weight Loss: A Randomized Controlled Trial in Older Women
Source: MDPI journal article supplement (doi:10.3390/nu14214540), 2022-10-28
Supplement: s1 [file s1]

Supplementary Table S1. The components for each package (10g)of supplements

|                   | WP    | WPH   |
|-------------------|-------|-------|
| Protein (g)       | 7.6   | 8.4   |
| Carbohydrate (g)  | 0.46  | 0.20  |
| Fat (g)           | 0.77  | 0.01  |
| Saturated fat (g) | 0.49  | 0.01  |
| Trans fat (g)     | 0.03  | 0.01  |
| Cholesterol (g)   | 0.015 | 0     |
| Energy (kcal)     | 165.5 | 146.9 |
